# Supplementary material for: COX-2–Independent Effects of Celecoxib Sensitize Lymphoma B Cells to TRAIL-Mediated Apoptosis
Source: Oxford University Press journal article supplement (doi:10.1158/1078-0432.ccr-13-2305), 2014-03-18

## SUPPLEMENTAL DATA

### Supplemental figures :

#### Supplemental figure 1. Expression of COX enzymes in stromal cells.

COX1 and COX-2 protein expressions were evaluated by western blotting in stromal cells, including HD-RESTO (n=4), FL-RESTO (n=4), FL-MSC (n=5) and HD-MSC (n=4).  $\beta$ -actin was used as a loading control.

#### Supplemental figure 2. Celecoxib potentiates TRAIL-induced apoptosis, even in the presence of bone marrow stromal cells.

HD-MSC were cultured at  $0.5 \times 10^5$  cells/cm<sup>2</sup>. After 3 days,  $10^5$  cells of NHL-B cell lines were seeded on these stromal cells and stimulated or not with 30 $\mu$ M celecoxib and/or 50ng/ml of TRAIL. B cell apoptosis was analyzed by flow cytometry gating on CD19<sup>pos</sup>CD20<sup>pos</sup>CD105<sup>neg</sup> active caspase-3<sup>pos</sup> cells. Apoptosis level of B cell lines without stromal cells (figure 2) was reported with dotted lines Mean $\pm$ SD, n=2.

#### Supplemental figure 3. Soluble factors effects on B cell survival after TRAIL treatment

(A) SUDHL4 and BL2 cell lines ( $10^5$  cells) were cultured on transwell (black bars) or co-cultured with HD-RESTO or HD-RESTO+B cells under transwell (white and grey bars, respectively). After TRAIL treatment (100ng/ml), indirect survival effect of soluble factors produced by stromal cells were evaluated, compared to co-culture without transwell (shaded bars), Mean $\pm$ SD, n=5. (B) BL2 and SUDHL4 were cultured with supernatants from HD-RESTO co-cultured or not with B cell lines (white and grey bars respectively) for 24h and treated with or without 100ng/ml TRAIL. These results were compared with B cells co-cultured with HD-RESTO (shaded bars). Mean $\pm$ SD, n=4. \* $p \leq 0.05$ , \*\* $p \leq 0.01$  and \*\*\* $p \leq 0.001$ .

#### Supplemental figure 4. Inefficiency of PGE2 as a survival factor.

(A) Expression of the 4 EP receptors (PGE2 receptors) in BL2 and SUDHL4 was evaluated by western blotting. (B) and (C) BL2 and SUDHL4 were cultured with X-VIVO medium and stimulated with PGE2 for 24h. (B) B cell proliferation was evaluated with tritiated thymidine (<sup>3</sup>H-TdR) incorporation. Results from one of three representative experiments. Mean  $\pm$  SD. (C) After PGE2 stimulation for 1h, BL2 and SUDHL4 were treated or not with 100ng/ml TRAIL for 24h. Apoptotic B cells were analysed by flow cytometry using CD19<sup>pos</sup>, CD20<sup>pos</sup> and active caspase-3 staining.

## **Supplemental material and methods**

### **B cell growth assay**

B cell growth was assessed by tritiated thymidine ( $^3\text{HTdR}$ , Perkin Elmer) incorporation. After serum deprivation, BL2 and SUDHL4 cell lines were cultured for 24h at  $10^5$  cells/ml in X-VIVO 20 medium, notably deprived in prostaglandin (Lonza, Basel, Switzerland). Cells were treated with different concentrations of PGE2 and pulsed with  $1\mu\text{Ci/well } ^3\text{HTdR}$  during the last 16h of treatment.

### **Chemical and antibodies**

PGE2 was purchased from Sigma-Aldrich. The anti-COX1, anti-COX-2, EP1, EP2, EP3 and EP4 antibodies were obtained from Cayman chemical (Ann Arbor, Michigan, USA).

## Supplemental figure 1

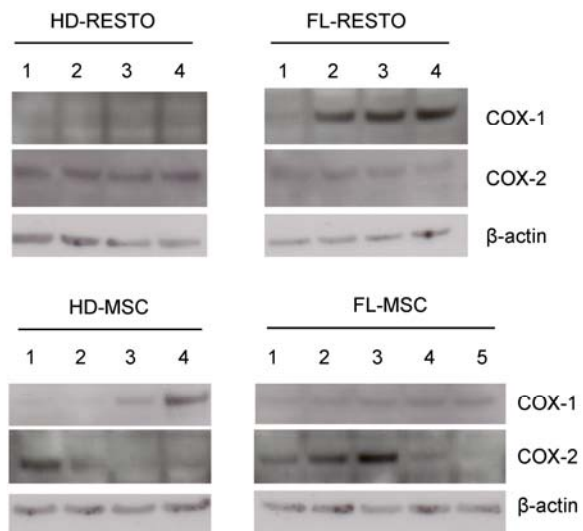

## Supplemental figure 2

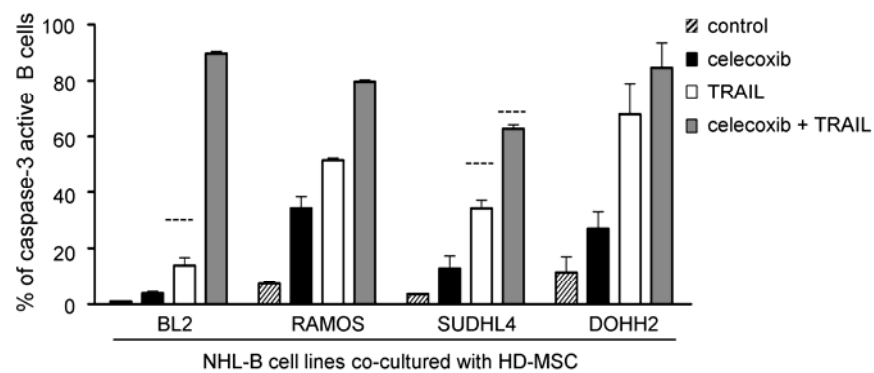

# Supplemental figure 3

**A** ■ B cells alone □ B cells + HD-RESTO under transwell ▨ B cells + HD-RESTO

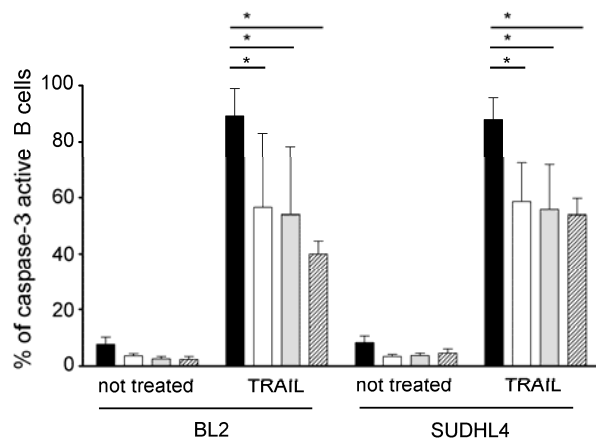

**B** ■ medium □ HD-RESTO + B cells supernatant □ HD-RESTO supernatant ▨ Bcells + HD-RESTO

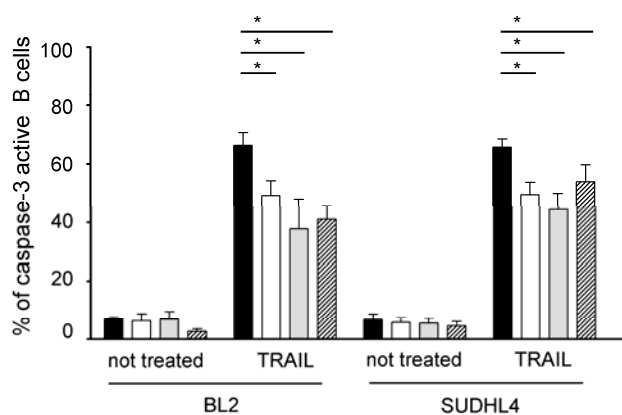

# Supplemental figure 4

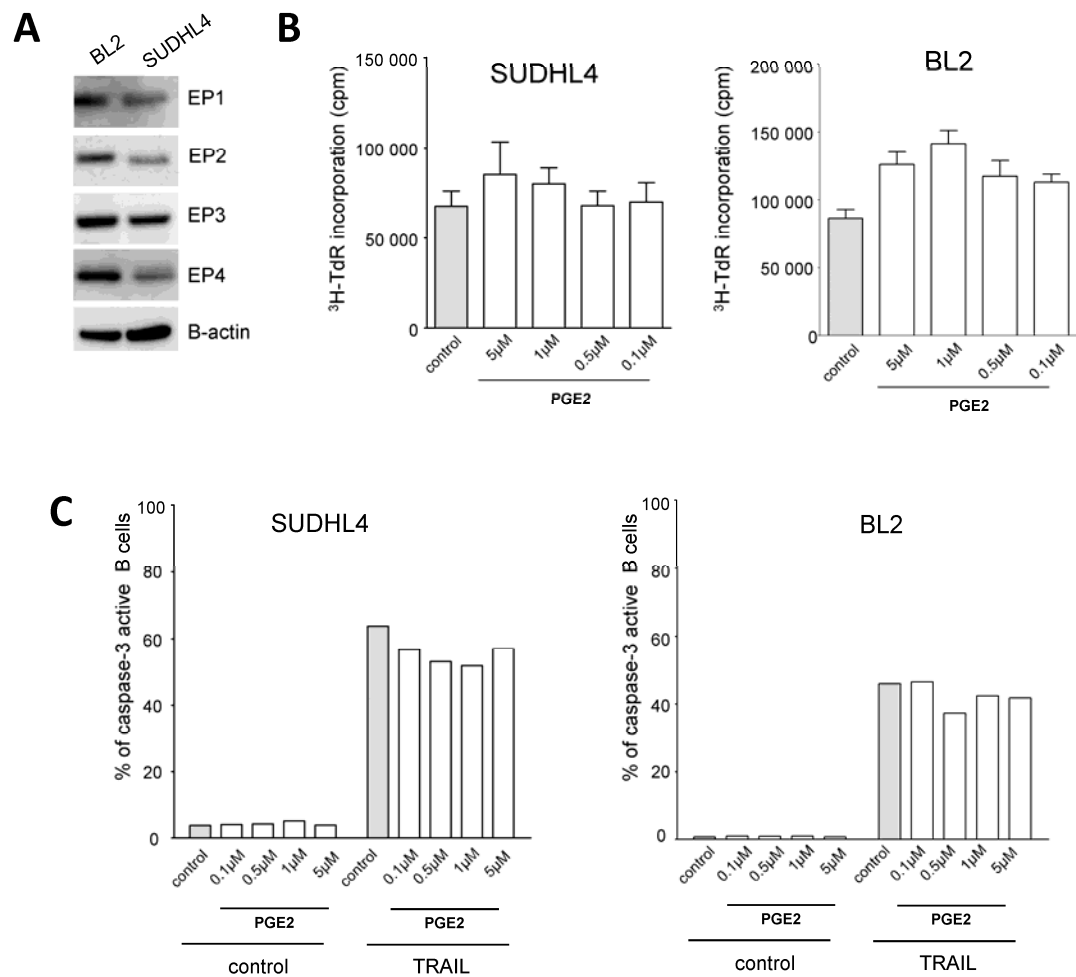

Supplement: 10780432ccr132305-sup-meth.pdf [file 10780432ccr132305-sup-meth.pdf]
